# Supplementary material for: Weakly-supervised deep learning models enable HER2-low prediction from H &E stained slides
Source: PubMed Central journal article supplement (PMC11331614; doi:10.1186/s13058-024-01863-0), 2024-08-19
Supplement: 13058_2024_1863_MOESM1_ESM.pdf [file 13058_2024_1863_MOESM1_ESM.pdf]

Supplementary material for  
**Weakly-supervised deep learning models  
enable HER2-low prediction from H&E  
stained slides**

Renan Valieris, Luan Martins, Alexandre Defelicibus,  
Adriana Passos Bueno, Cynthia Aparecida Bueno de Toledo Osorio,  
Dirce Carraro, Emmanuel Dias-Neto, Rafael A. Rosales,  
Jose Marcio Barros de Figueiredo and Israel Tojal da Silva

May 17, 2024

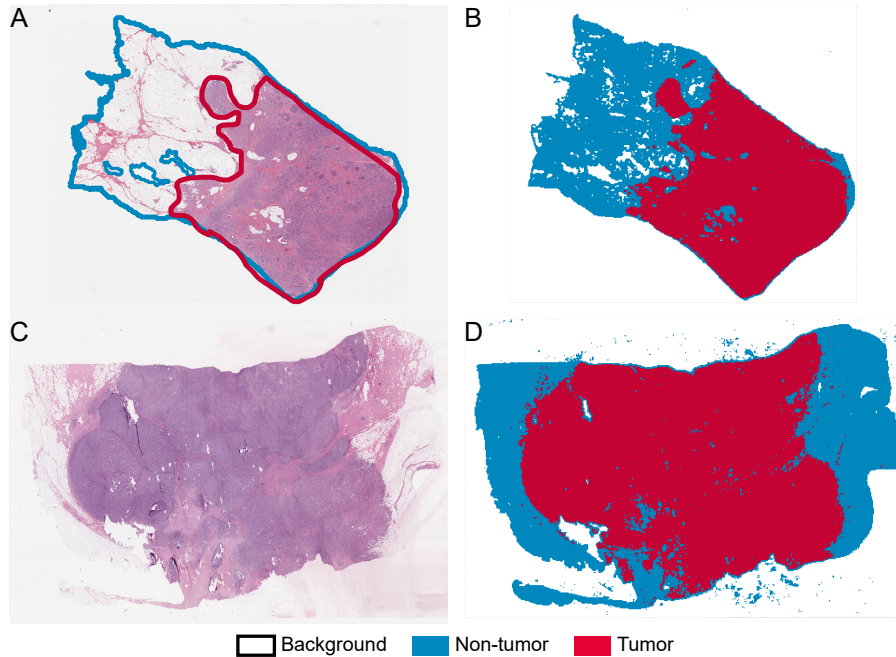

Figure 1: Tumor-background detection example. (A) Example of a slide from the TCGA-BRCA cohort with annotations of non-tumor (in blue) and tumor (in red), used to train the tumor-background detection model. (B) Model inference result on the same TCGA-BRCA slide. (C) Example of a slide from the ACCCC cohort. (D) Model inference result on the ACCCC example slide.

Table 1: Test metrics of each model on the internal and external (TCGA) sets.

| Test set | Model | AUROC      | Precision  | Recall     | F1-Score   |
|----------|-------|------------|------------|------------|------------|
| Internal | M1    | 0.90 +0.01 | 0.82 +0.02 | 0.83 +0.02 | 0.83 +0.02 |
|          | M2    | 0.85 +0.02 | 0.77 +0.02 | 0.77 +0.02 | 0.77 +0.02 |
|          | M3    | 0.87 +0.02 | 0.81 +0.02 | 0.79 +0.04 | 0.80 +0.03 |
|          | M4    | 0.85 +0.01 | 0.70 +0.01 | 0.70 +0.01 | 0.70 +0.01 |
|          | M5    | 0.72 +0.02 | 0.65 +0.02 | 0.65 +0.01 | 0.65 +0.02 |
|          | M6    | 0.78 +0.02 | 0.57 +0.03 | 0.58 +0.03 | 0.57 +0.03 |
| External | M1    | 0.63 +0.02 | 0.60 +0.02 | 0.60 +0.02 | 0.59 +0.03 |
|          | M2    | 0.79 +0.01 | 0.64 +0.02 | 0.68 +0.03 | 0.58 +0.04 |
|          | M3    | 0.62 +0.01 | 0.57 +0.02 | 0.58 +0.02 | 0.57 +0.02 |
|          | M4    | 0.65 +0.01 | 0.40 +0.04 | 0.48 +0.01 | 0.36 +0.02 |
|          | M5    | 0.63 +0.03 | 0.54 +0.01 | 0.60 +0.03 | 0.40 +0.02 |
|          | M6    | 0.61 +0.01 | 0.39 +0.02 | 0.44 +0.02 | 0.31 +0.02 |

Table 2: Histological characteristics stratified by HER2 status. SBR indicates Scarf-Bloom-Richardson. A sample is considered NEG with an IHC score of 0, LOW with an IHC score of 1+ or with an IHC score of 2+ with a negative ISH-based test result, and HIGH with an IHC score of 2+ with a positive ISH-based test or with an IHC score of 3+.

|                                | NEG | LOW | HIGH |
|--------------------------------|-----|-----|------|
| <b>Nuclear grade</b>           |     |     |      |
| 1                              | 5   | 7   | 1    |
| 1 and 2                        | 2   | 4   | 0    |
| 2                              | 79  | 97  | 11   |
| 2 and 3                        | 2   | 4   | 3    |
| 3                              | 113 | 109 | 121  |
| <b>Inflammatory Infiltrate</b> |     |     |      |
| Not found                      | 0   | 2   | 0    |
| Low                            | 152 | 158 | 55   |
| Moderate                       | 26  | 29  | 28   |
| High                           | 13  | 2   | 8    |
| <b>Mitotic Score</b>           |     |     |      |
| Score 1                        | 104 | 116 | 42   |
| Score 2                        | 44  | 44  | 25   |
| Score 3                        | 39  | 27  | 20   |
| <b>TILs</b>                    |     |     |      |
| $\geq 10$                      | 27  | 22  | 22   |
| $< 10$                         | 93  | 76  | 29   |
| <b>Immunophenotype</b>         |     |     |      |
| Not determined                 | 1   | 4   | 1    |
| TNBC                           | 43  | 7   | 0    |
| Luminal                        | 30  | 48  | 1    |
| LUMA                           | 36  | 20  | 1    |
| LUMB                           | 82  | 110 | 19   |
| Luminal B-HER2                 | 0   | 0   | 27   |
| HER2 overexpression            | 0   | 0   | 46   |
| <b>SBR grade</b>               |     |     |      |
| Grade I                        | 26  | 31  | 1    |
| Grade II                       | 90  | 102 | 44   |
| Grade III                      | 70  | 53  | 38   |
| <b>Tissue source</b>           |     |     |      |
| Biopsy                         | 106 | 147 | 95   |
| Resection                      | 99  | 86  | 53   |
| <b>Microcalcifications</b>     |     |     |      |
| Absent                         | 154 | 153 | 92   |
| Present                        | 46  | 72  | 48   |
| <b>Necrosis</b>                |     |     |      |
| Absent                         | 153 | 167 | 83   |
| Present                        | 52  | 66  | 65   |
| <b>Histological group</b>      |     |     |      |
| Undefined                      | 24  | 27  | 10   |
| In situ (DCIS)                 | 11  | 36  | 53   |
| No special type (NST)          | 134 | 134 | 71   |
| Special type (ST)              | 19  | 18  | 7    |

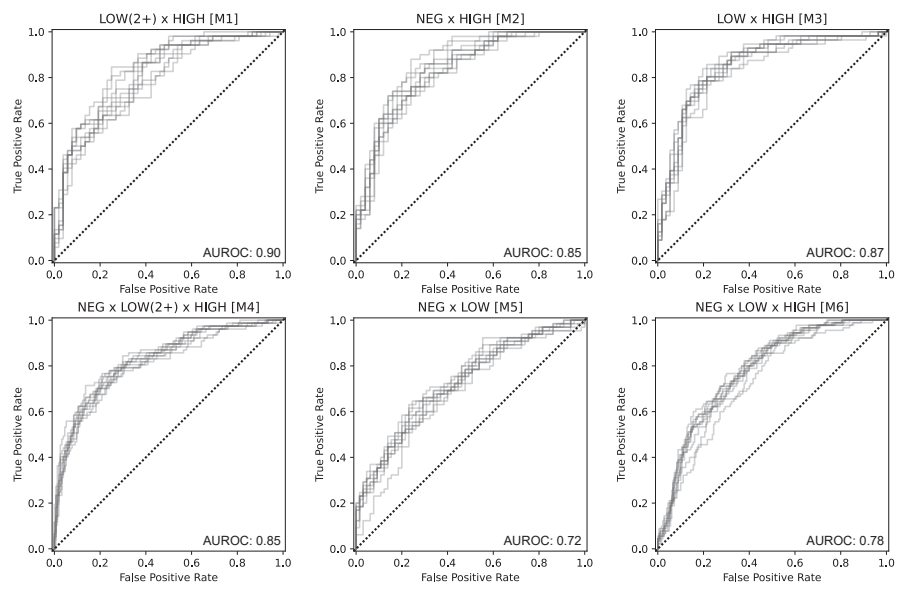

Figure 2: ROC curves obtained for each model, we plot all 10 curves obtained for each fold of the cross-validation on the internal test set. The median AUROC is noted on the bottom right.



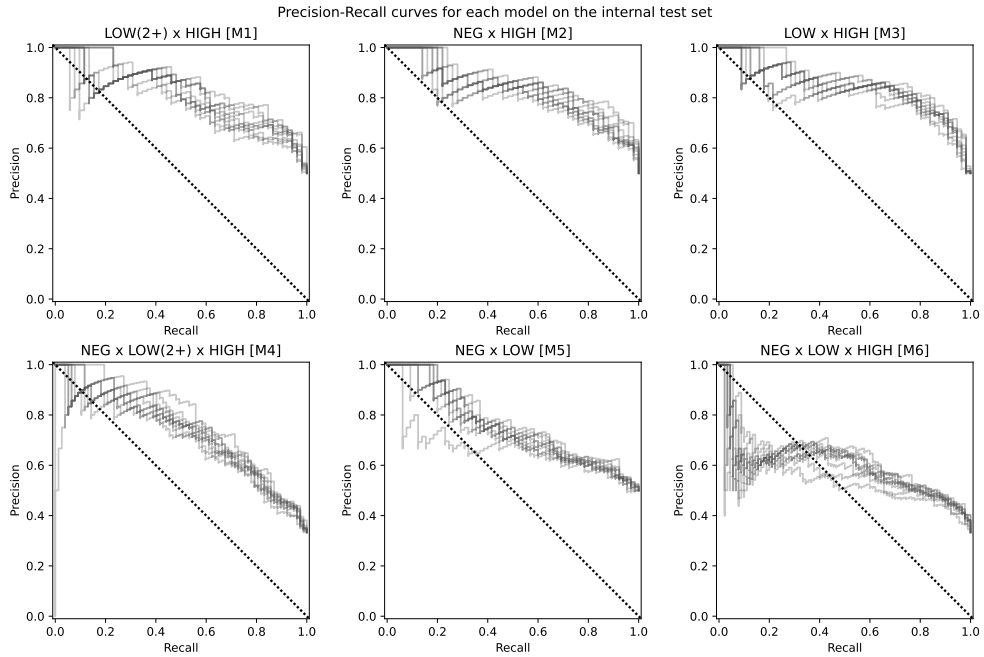

Figure 3: Precision-Recall curves obtained for each model, we plot all 10 curves obtained for each fold of the cross-validation on the internal test set.

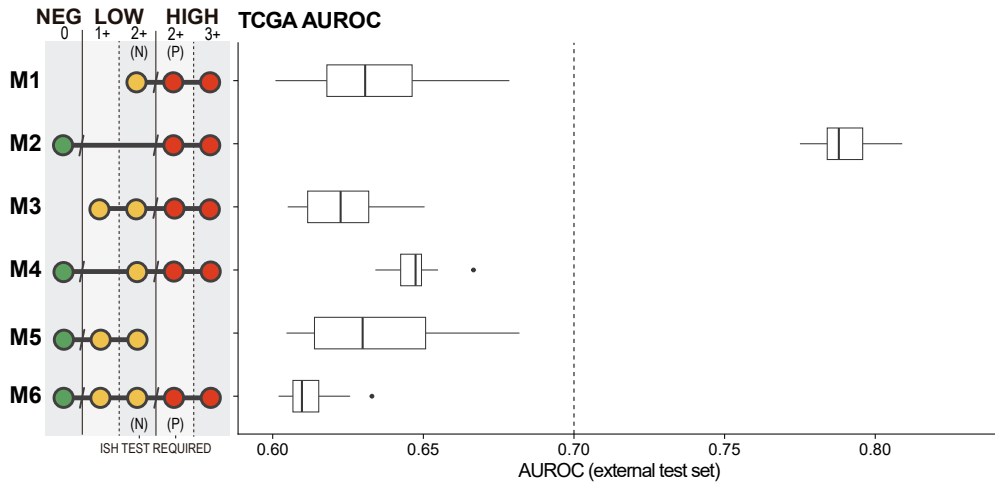

Figure 4: Model performance in the TCGA external validation set.

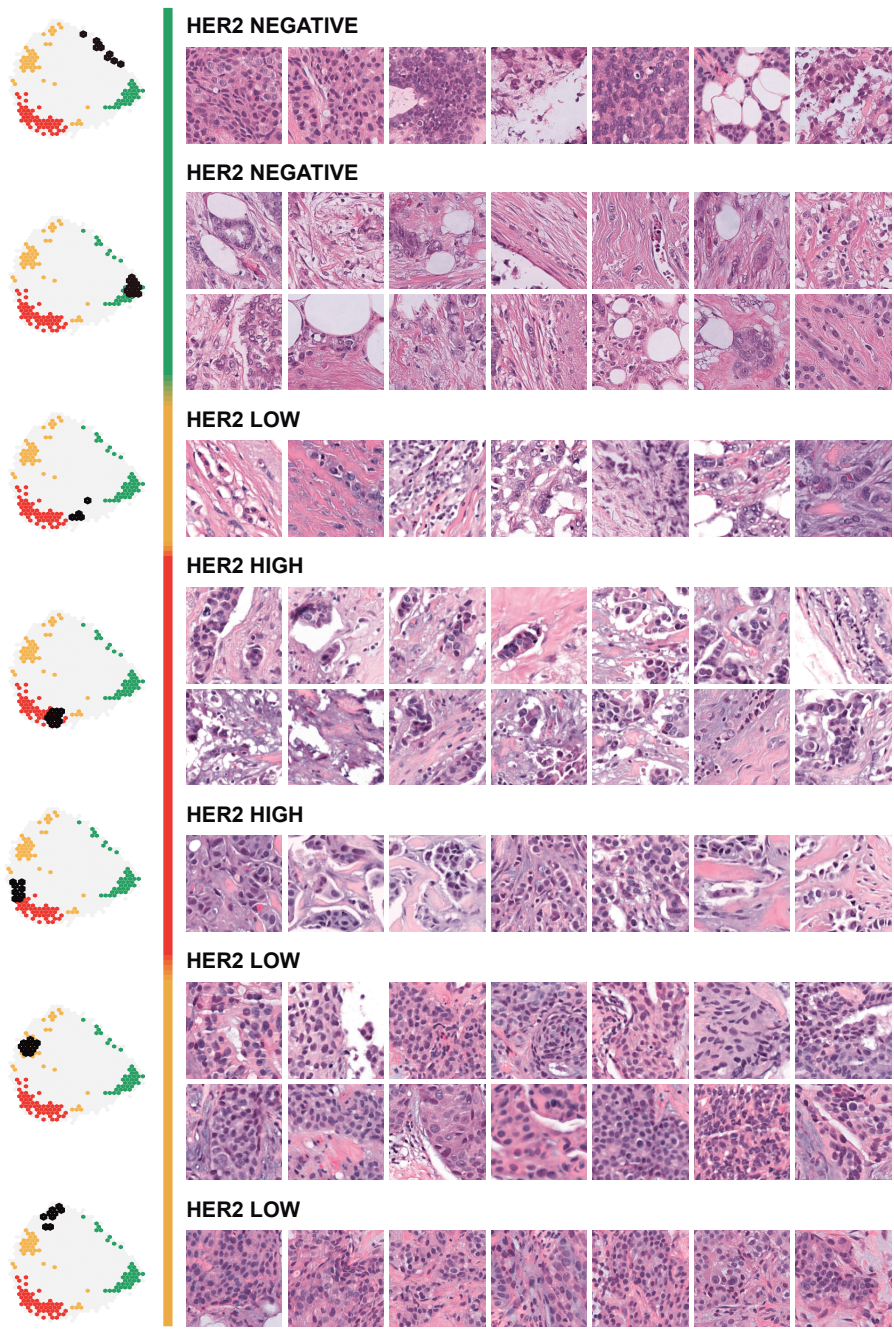

Figure 5: Examples of actionable tiles, sampled for each group from the corresponding points highlighted on the left.

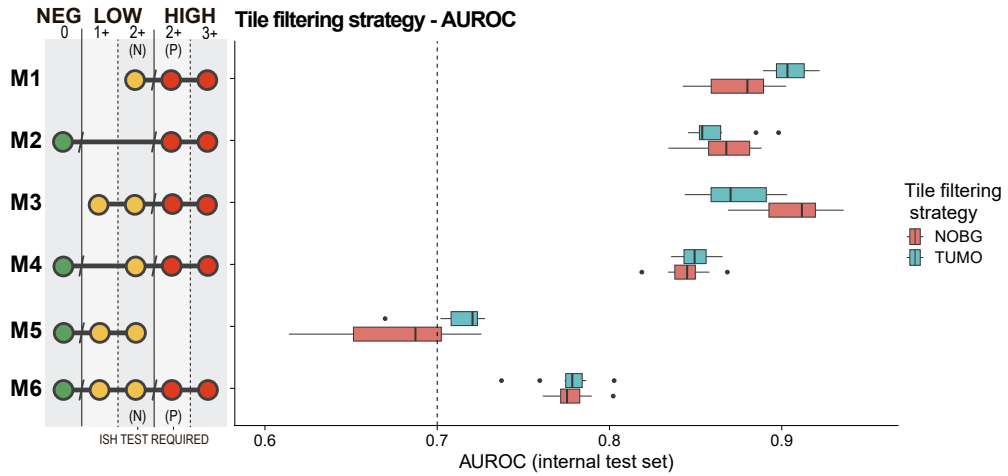

Figure 6: Internal validation test AUROC obtained with different tile filtering strategies. It can be noted that including only tiles of tumor region (TUMO) has a higher predictive performance than filtering only background tiles (NOBG).

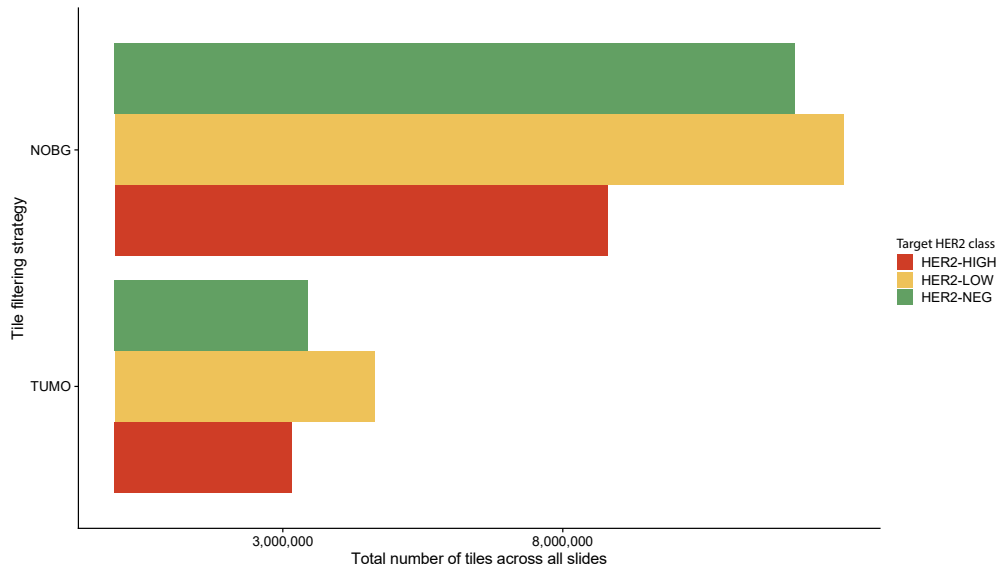

Figure 7: Number of tiles for each of the tile filtering approaches tested for each class. Filtering only background tiles leaves 3 to 5 times more tiles for training.

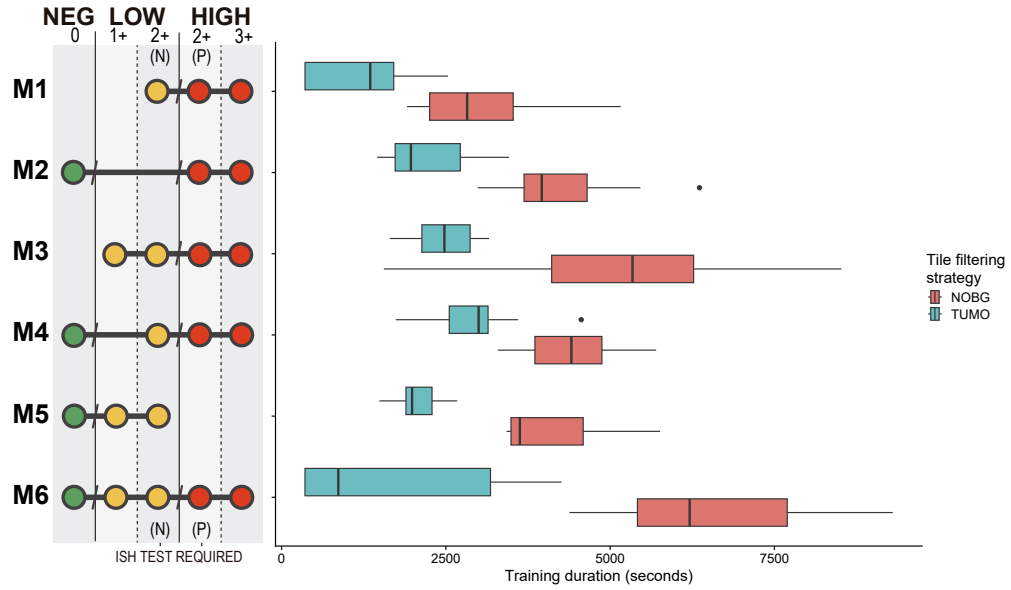

Figure 8: Training duration in seconds for different models and tile filtering strategies.

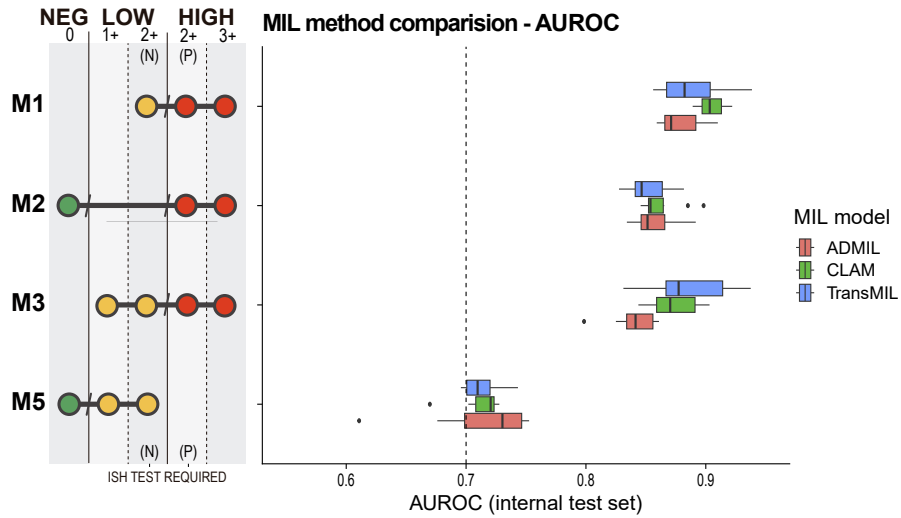

Figure 9: Performance comparison of the MIL methods on the internal test set.

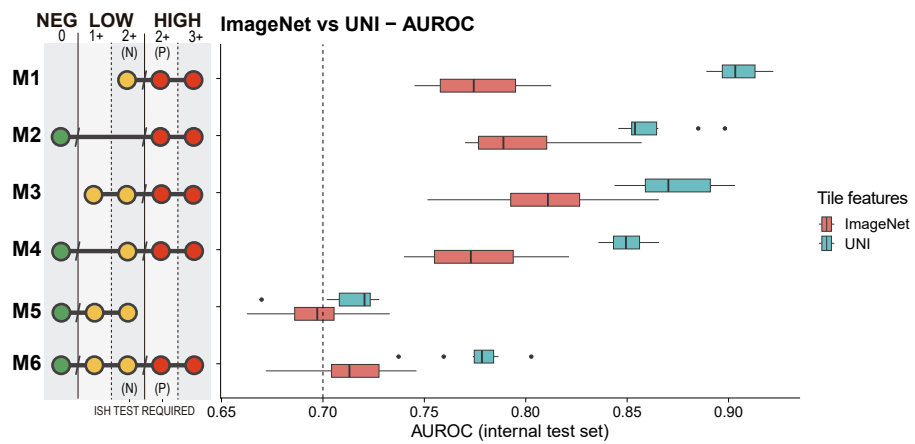

Figure 10: Internal validation test AUROC shows the performance improvement when using UNI as the feature extractor compared to an ResNet50 pretrained with ImageNet.
